# Supplementary material for: In vitro modeling of the human dopaminergic system using spatially arranged ventral midbrain–striatum–cortex assembloids
Source: PubMed Central journal article supplement (PMC10703680; doi:10.1038/s41592-023-02080-x), 2023-12-05
Supplement: 41592_2023_2080_MOESM1_ESM.pdf [file 41592_2023_2080_MOESM1_ESM.pdf]

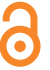

---

# **In vitro modeling of the human dopaminergic system using spatially arranged ventral midbrain–striatum–cortex assembloids**

---

In the format provided by the authors and unedited

**Supplementary Table S1- qPCR primers**

| <b>Gene</b>                   | <b>Forward primer</b>  | <b>Reverse Primer</b>  |
|-------------------------------|------------------------|------------------------|
| <b>ACTB</b>                   | CCTTGACATGCCGGAG       | GCACAGAGCCTCGCCTT      |
| <b>GAPDH</b>                  | TTGAGGTCAATGAAGGGGTC   | GAAGGTGAAGGTCGGAGTCA   |
| <b>SHH</b>                    | CCAATTACAACCCCGACATC   | AGTTTCACTCCTGGCCACTG   |
| <b>EN1</b>                    | CGTGGCTTACTCCCCATTTA   | TCTCGCTGTCTCTCCCTCTC   |
| <b>FOXA2</b>                  | CCGTTCTCCATCAACAACCT   | GGGGTAGTGCATCACCTGTT   |
| <b>CORIN</b>                  | CATATCTCCATCGCCTCAGTTG | GGCAGGAGTCCATGACTGT    |
| <b>NURR1</b>                  | CAGGCGTTTTTCGAGGAAAT   | GAGACGCGGAGAACTCCTAA   |
| <b>OTX2</b>                   | ACAAGTGGCCAATTCACTCC   | GAGGTGGACAAGGGATCTGA   |
| <b>LMX1A</b>                  | CGCATCGTTTCTTCTCTCT    | CAGACAGACTTGGGGCTCAC   |
| <b>LMX1B</b>                  | CTTAACCAGCCTCAGCGACT   | TCAGGAGCGAAGTAGGAAC    |
| <b>TH</b>                     | CGGGCTTCTCGACCAGGTGTA  | CTCCTCGGCGGTGTACTCCACA |
| <b>TBR1</b>                   | TCGTCCCCGCTCAAGAGCGA   | CCTTGGCGCAGTTCTTCTCGCA |
| <b>PAX6</b>                   | TGGTATTCTCTCCCCTCCT    | TAAGGATGTTGAACGGGCAG   |
| <b>FOXG1</b>                  | TGGCCCATGTCGCCCTTCT    | GCCGACGTGGTGCCGTTGTA   |
| <b>FOXA2 (SAG dose-curve)</b> | GCTGGTCGTTTGTGTGGC     | AGGCCGGCGTTCATGTTG     |

**Supplementary Table S2- Primary Antibodies**

| Species | Antigen                                     | Producer           | Cat#         | Dilution used in 2D*         |
|---------|---------------------------------------------|--------------------|--------------|------------------------------|
| Mouse   | ALDH1A1 (Clone B-5)                         | Santa Cruz Biotech | sc-374149    | 1:50                         |
| Rabbit  | Calbindin                                   | Aves lab/Swant     | CD38a D-28K  | 1:1000                       |
| Rat     | CTIP2/ BCL11b                               | Abcam              | ab18465      | 1:300                        |
| Rabbit  | DARPP32 (Clone EP720Y)                      | Abcam              | ab40801      | 1:100                        |
| Goat    | DARPP32                                     | R&D systems        | AF6259       | 1:100                        |
| Rat     | DAT (Clone DAT-NT)                          | Millipore          | MAB369       | 1:1000                       |
| Goat    | DLX2                                        | Santa Cruz Biotech | sc-18140     | 1:100                        |
| Sheep   | DLX5                                        | R&D Systems        | AF6710       | 1:100                        |
| Rabbit  | DRD1                                        | Abcam              | ab20066      | 1:400                        |
| Rabbit  | DRD2                                        | Millipore          | AB5084P      | 1:100                        |
| Rabbit  | DsRed/tdtomato/Crimson                      | Clontech           | 632496       | 1:250                        |
| Rabbit  | EN2                                         | LSBio              | LS-B9057-200 | 1:100                        |
| Goat    | FOXA2                                       | R&D Systems        | AF2400       | 1:300                        |
| Rabbit  | FoxG1                                       | Abcam              | ab18259      | 1:200                        |
| Rabbit  | FOXP1                                       | Abcam              | AB16645      | 1:200                        |
| Rabbit  | GABA                                        | Sigma-Aldrich      | a2052        | 1:200                        |
| Mouse   | GAD67 (Clone 1G10.2)                        | Millipore          | MAB5406      | 1:200                        |
| Chicken | GFP                                         | Aves Labs          | GFP-1020     | 1:500                        |
| Rabbit  | GIRK2 (Kir3.2)                              | Alomone Labs       | APC-006      | 1:400                        |
| Rabbit  | GSX2/GSH                                    | Millipore          | ABN162       | 1:100                        |
| Rabbit  | ISL-1                                       | Abcam              | AB20670      | 1:100                        |
| Rabbit  | LMX1a                                       | Sigma-Aldrich      | AB10533      | 1:100                        |
| Rabbit  | MASH1/ASCL1                                 | Abcam              | AB74065      | 1:100                        |
| Rabbit  | Nkx2.1/Thyroid (TTF1)<br>(Clone EPR5955(2)) | Epitomics          | 6594-1       | 1:1000                       |
| Goat    | OTX2                                        | R&D Systems        | AF1979       | 1:100                        |
| Mouse   | PAX6 (Clone AD2.38)                         | Abcam              | ab78545      | 1:100                        |
| Sheep   | PAX6                                        | R&D Systems        | AF8150       | 1:200 of 100 µl reconstitute |
| Rabbit  | RFP/tdtomato/Crimson                        | Abcam              | ab62341      | 1:100                        |
| Rabbit  | SOX2                                        | Abcam              | ab97959      | 1:600                        |
| Goat    | SOX2                                        | R&D Systems        | AF2018       | 1:100                        |
| Rabbit  | SOX6                                        | Abcam              | ab30455      | 1:500                        |
| Rabbit  | TBR1                                        | Abcam              | ab31940      | 1:300                        |
| Rabbit  | TH                                          | Abcam              | ab112        | 1:300                        |
| Sheep   | TH                                          | Abcam              | ab113        | 1:400                        |

\*For 3D IHC, 5x the concentration of 2D antibodies was used in this study. Notably, this concentration might have to be adjusted dependent on antibody efficiency, availability of antigen and tissue size.

**Supplementary Table S3 – Secondary Antibodies**

| <b>Species</b> | <b>Anti-</b> | <b>Fluorophore</b> | <b>Producer</b>        | <b>Cat#</b> |
|----------------|--------------|--------------------|------------------------|-------------|
| <b>Donkey</b>  | Mouse        | AF488              | Invitrogen             | A21202      |
| <b>Donkey</b>  | Mouse        | AF568              | Invitrogen             | A10037      |
| <b>Donkey</b>  | Mouse        | AF647              | Invitrogen             | A31571      |
| <b>Donkey</b>  | Rabbit       | AF488              | Invitrogen             | A21206      |
| <b>Donkey</b>  | Rabbit       | AF568              | Invitrogen             | A10042      |
| <b>Donkey</b>  | Rabbit       | AF647              | Invitrogen             | A31573      |
| <b>Donkey</b>  | Rat          | AF488              | Invitrogen             | A21208      |
| <b>Donkey</b>  | Rat          | AF647              | Jackson ImmunoResearch | 712-605-150 |
| <b>Donkey</b>  | Goat         | AF488              | Invitrogen             | A11055      |
| <b>Donkey</b>  | Goat         | AF568              | Invitrogen             | A11057      |
| <b>Donkey</b>  | Goat         | AF647              | Invitrogen             | A21447      |
| <b>Donkey</b>  | Sheep        | AF488              | Invitrogen             | A11015      |
| <b>Donkey</b>  | Sheep        | AF568              | Invitrogen             | A21099      |
| <b>Donkey</b>  | Sheep        | AF647              | Jackson ImmunoResearch | 713-605-147 |
| <b>Donkey</b>  | Chicken      | AF488              | Jackson ImmunoResearch | 703-545-155 |
| <b>Donkey</b>  | Chicken      | AF647              | Jackson ImmunoResearch | 703-605-155 |

Secondary antibodies were used 1:500 in 2D IHC and 1:100 in 3D IHC.
